# Supplementary material for: ANbO3 (A = Na, K) and (A′ = Ca, Sr) composite oxides for oxidative coupling of methane and oxidative dehydrogenation of ethane: perovskite vs. layered perovskite
Source: Royal Society of Chemistry journal article supplement (doi:10.1039/d3cy01055d), 2023-01-01
Supplement: d3cy01055d1.pdf [file d3cy01055d1.pdf]

# Electronic Supplementary Information

## **ANbO<sub>3</sub> (A=Na, K) and A<sub>2</sub>Nb<sub>2</sub>O<sub>7</sub> (A'=Ca, Sr) composite oxides for oxidative coupling of methane and oxidative dehydrogenation of ethane: Perovskite vs. layered perovskite**

Junwei Xu<sup>1\*#</sup>, Xusheng Zhong<sup>2#</sup>, Rumeng Ouyang<sup>2</sup>, Xiuzhong Fang<sup>2</sup>, Xianglan Xu<sup>2</sup>, Xiang Wang<sup>2\*</sup>

1. *Department of Applied Chemistry, Jiang Xi Academy of Sciences, Nanchang, 330096, China.*
2. *Key Laboratory of Jiangxi Province for Environment and Energy Catalysis, School of Chemistry and Chemical Engineering, Nanchang University, Nanchang, 330031, China.*

\* *Corresponding author. E-mail: Xujunwei0102@163.com; xwang23@ncu.edu.cn*

# These authors contributed equally to this work.

### **1. Supplementary Experimental Information**

#### **1.1 Catalyst characterization**

The crystal phase structure of the fresh and spent catalysts was analyzed by X-ray powder diffraction (XRD) which was carried out in a Bruker AXS D8 Focus of 40KV acceleration voltage and 30 mA emission current using a Cu target and K $\alpha$ -ray irradiation, 2 $\theta$  gap of 10° to 80° with step of 0.02°/s.

X-ray photoelectron spectroscopy (XPS) characterization was carried out in a ESCALAB250xi X-ray photoelectron spectroscopy system equipped a single MgK $\alpha$  X-ray source operated at 300 W and 15 kV voltage. The binding energies were calibrated based on the C 1s peak of graphite at 284.6 eV.

The specific surface area of the fresh and spent catalysts was measured by nitrogen adsorption-desorption at 77 K on an ST-08B instrument and determined using the Brunauer–Emmett–Teller (BET) equation.

*In situ* Raman spectra of all the catalysts were performed on a Renishaw in Via instrument using a 532 nm laser source equipped with a Linkam TS 1500 micro-size in situ cell, with a scanning Raman shift range of 100-1000  $\text{cm}^{-1}$ . All samples were pretreated in an Ar atmosphere with a gas flow rate of 30 mL/min at 800 °C for half an hour and then cooled to room temperature. An air flow was introduced at a rate of 30 mL/min and heated at a rate of 10 °C/min from ambient temperature to 800 °C. Raman spectra were collected at 25, 200, 400, 600, and 800 °C.

$\text{CH}_4$ -TPSR-MS,  $\text{C}_2\text{H}_6$ -TPSR-MS,  $\text{CH}_4$ -pulse and  $\text{C}_2\text{H}_6$ -pulse test were performed on a BelCata II apparatus equipped with a BelMass using quadruple as a mass analyzer. The outlet products ( $\text{C}_2\text{H}_4$   $m/z=27$ ,  $\text{C}_2\text{H}_6$   $m/z=30$  CO  $m/z=28$  and  $\text{CO}_2$   $m/z=44$ ) were measured instantaneously with the mass spectrometer system. Typically, a certain weight of the samples was pretreated at 800 °C under a pure He atmosphere (30 mL/min) for 30 min, which was then cooled to 50 °C. The sample pre-treatment for all subsequent testing experiments is the same as this process.

For  $\text{CH}_4$ -TPSR-MS experiment, 200 mg of a catalyst sample was first heated at a rate of 10 °C/min in a He atmosphere (60 mL/min) to 800 °C for removing surface impurities. The sample was then cooled to 50 °C and introduced into a mixed gas ( $\text{CH}_4$ :He=3:4) with a flow rate of 60 mL/min at the same temperature; subsequently, it was heated to 800 °C at a rate of 10 °C/min to record the relevant mass spectrometry signals.

For  $\text{CH}_4$ -pulse experiment, 200 mg of catalyst is heated for half an hour at 10 °C/min in a 10%  $\text{O}_2$ -He (flow rate of 30 mL/min) atmosphere from room temperature to 800 °C to achieve saturation of oxygen adsorption. After He gas (flow rate of 30 mL/min) was incorporated for 15 min to remove physically adsorbed  $\text{O}_2$  on the surface, 1 mL of methane was pulsed every 3 min to collect relevant mass spectrometry signals.

For  $\text{C}_2\text{H}_6$ -TPSR-MS experiment, the samples were subjected to a  $\text{C}_2\text{H}_6$ :He=1:8 flow rate of 60 mL/min at 50 °C and then heated to 700 °C at a rate of 10 °C/min to record the relevant mass spectrometry signals.

Electron paramagnetic resonance (EPR) spectra of reactive oxygen species were recorded with a JEOL FA-200 EPR Spectrometer, operating with a field modulation of 100 kHz and microwave frequencies of 9067.558 MHz.

## 2. Supplementary Results

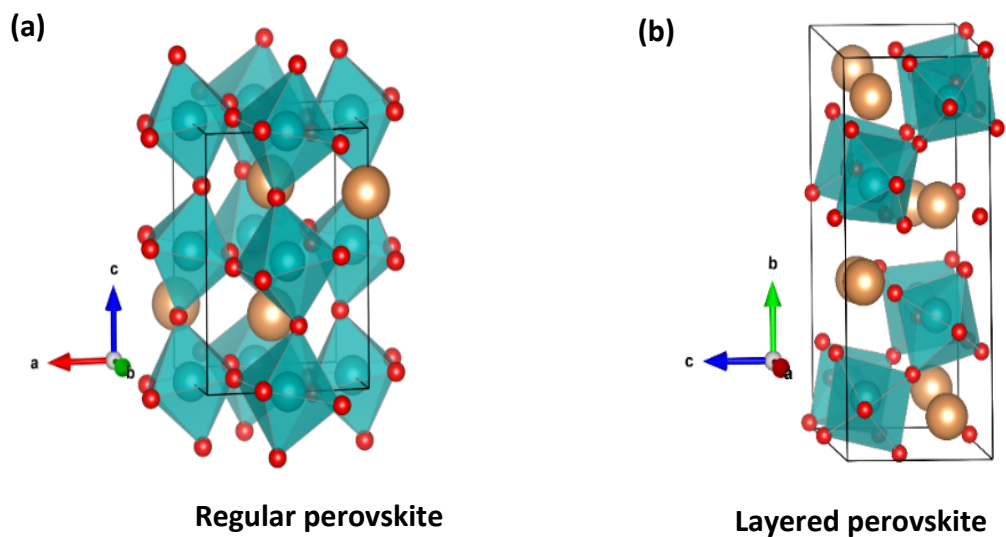

**Scheme S1.** Crystalline phase structures of the (a) regular perovskite and (b) monoclinic layered perovskite.

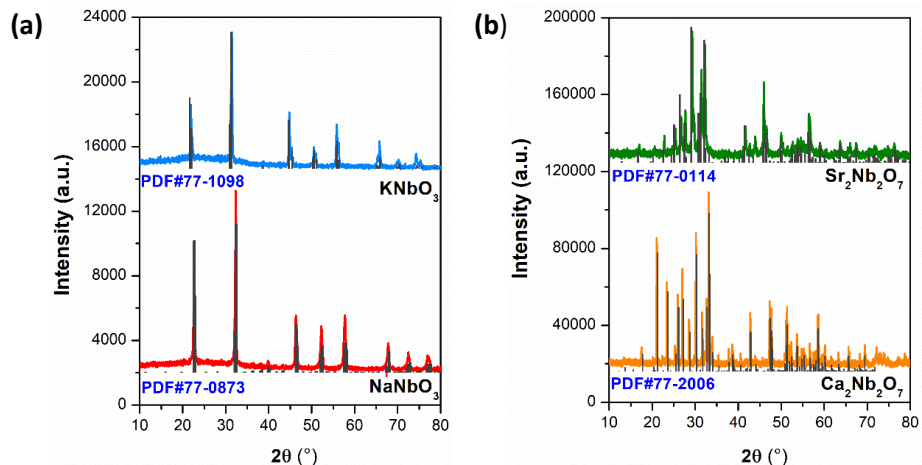

Fig. S1 XRD patterns of the (a)  $\text{ANbO}_3$  (A=Na, K) and (b)  $\text{A}_2\text{Nb}_2\text{O}_7$  (A=Ca, Sr) samples.

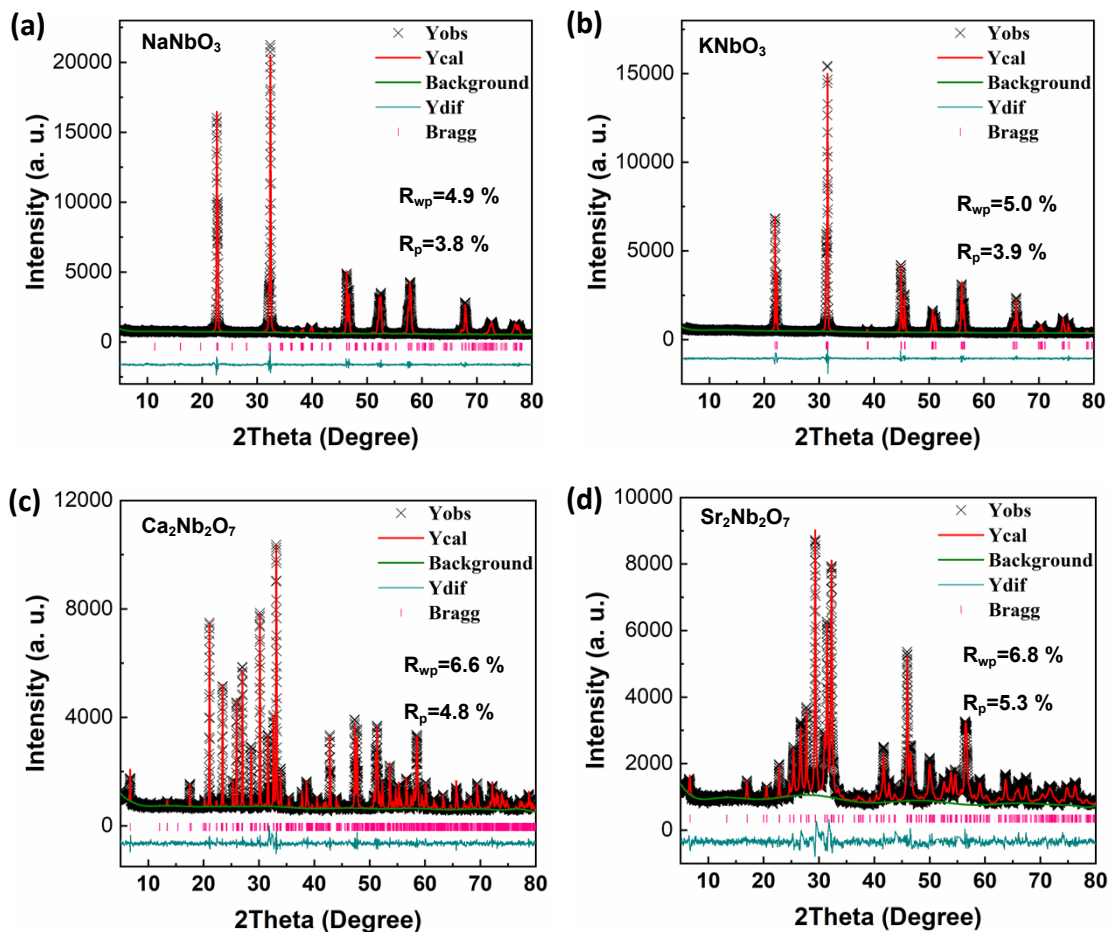

Fig. S2 The Rietveld refinement XRD patterns of (a)  $\text{NaNbO}_3$ , (b)  $\text{KNbO}_3$ , (c)  $\text{Ca}_2\text{Nb}_2\text{O}_7$ , (d)  $\text{Sr}_2\text{Nb}_2\text{O}_7$ .

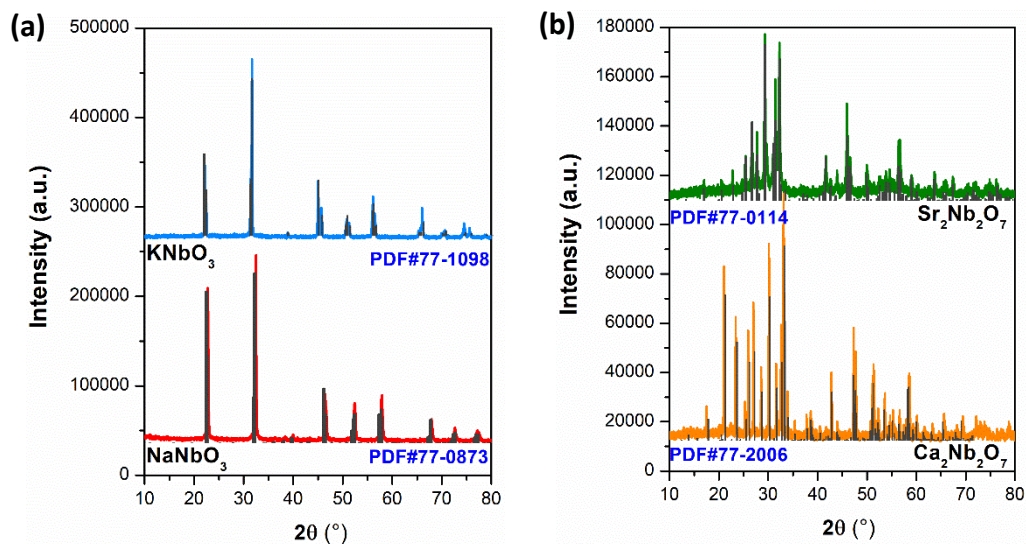

**Fig. S3** XRD patterns of the spent catalysts after OCM reaction (a)  $\text{ANbO}_3$  (A=Na, K) and (b)  $\text{A}_2\text{Nb}_2\text{O}_7$  (A=Ca, Sr) samples.

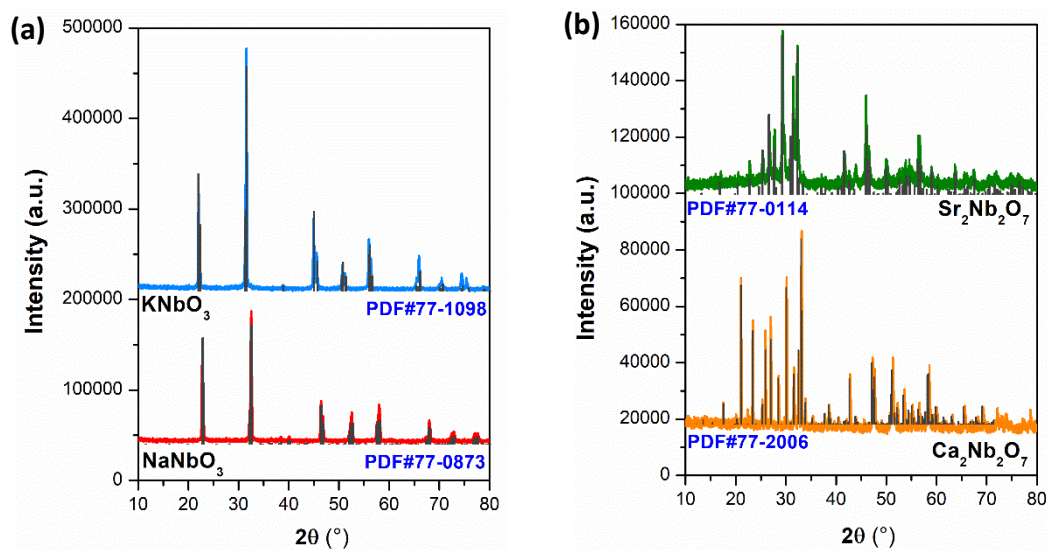

**Fig. S4** XRD patterns of the spent catalysts after ODHE reaction (a)  $\text{ANbO}_3$  (A=Na, K) and (b)  $\text{A}_2\text{Nb}_2\text{O}_7$  (A=Ca, Sr) samples.

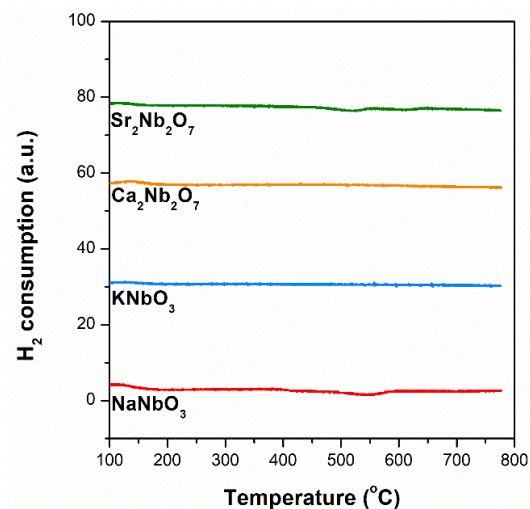

**Fig. S5** H<sub>2</sub>-TPR profiles of the ANbO<sub>3</sub> (A=Na, K) and A<sub>2</sub>Nb<sub>2</sub>O<sub>7</sub> (A=Ca, Sr) samples.

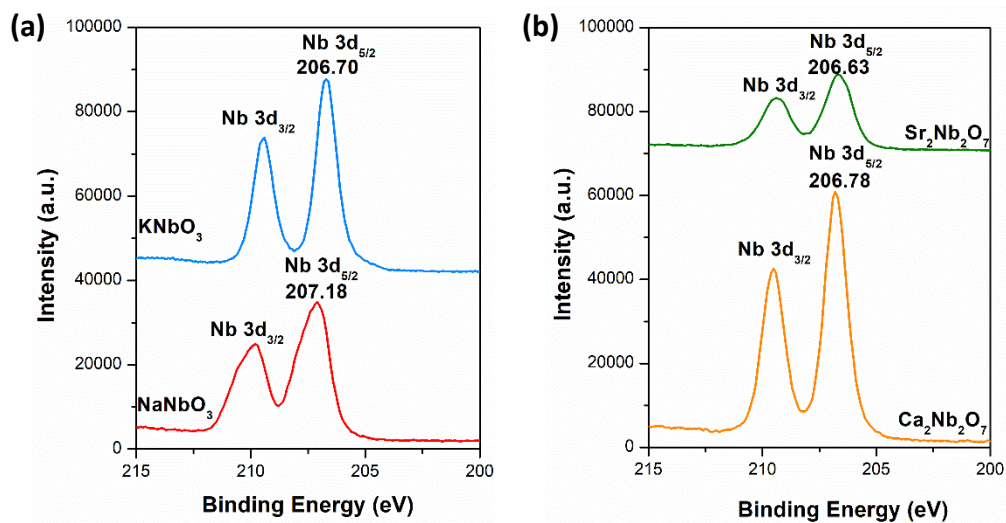

**Fig. S6** Nb 3d spectra of (a) ANbO<sub>3</sub> (A=Na, K) and (b) A<sub>2</sub>Nb<sub>2</sub>O<sub>7</sub> (A=Ca, Sr) samples.

**Table S1** Refined Nb-O bond lengths of ANbO<sub>3</sub> (A=Na, K) and A<sub>2</sub>Nb<sub>2</sub>O<sub>7</sub> (A=Ca, Sr) samples.

| Samples            | Nb-O bond length (Å) | Average Nb-O bond length (Å) | Samples                                        | Nb-O bond length (Å) | Average Nb-O bond length (Å) |
|--------------------|----------------------|------------------------------|------------------------------------------------|----------------------|------------------------------|
| NaNbO <sub>3</sub> | Nb-O1 1.982 (1)      | 1.992                        | Ca <sub>2</sub> Nb <sub>2</sub> O <sub>7</sub> | Nb-O2 2.575 (6)      | 2.052                        |
|                    | Nb-O2 1.980 (1)      |                              |                                                | Nb-O3 2.003 (4)      |                              |
|                    | Nb-O3 2.103 (2)      |                              |                                                | Nb-O3 2.003 (4)      |                              |
|                    | Nb-O3 1.884 (1)      |                              |                                                | Nb-O4 2.120 (5)      |                              |
|                    | Nb-O4 2.096 (2)      |                              |                                                | Nb-O5 1.760 (5)      |                              |
|                    | Nb-O4 1.904 (1)      |                              |                                                | Nb-O6 1.851 (4)      |                              |
| KNbO <sub>3</sub>  | Nb-O1 2.037 (1)      | 2.011                        | Sr <sub>2</sub> Nb <sub>2</sub> O <sub>7</sub> | Nb-O4 1.786 (1)      | 2.062                        |
|                    | Nb-O2 1.958 (1)      |                              |                                                | Nb-O5 1.999 (1)      |                              |
|                    | Nb-O2 2.124 (1)      |                              |                                                | Nb-O6 2.357 (2)      |                              |
|                    | Nb-O2 2.124 (1)      |                              |                                                | Nb-O7 1.867 (1)      |                              |
|                    | Nb-O2 1.910 (2)      |                              |                                                | Nb-O8 2.253 (2)      |                              |
|                    | Nb-O2 1.910 (1)      |                              |                                                | Nb-O9 2.109 (2)      |                              |
